# Supplementary material for: Role of PTEN, PI3K, and mTOR in Triple-Negative Breast Cancer
Source: MDPI journal article supplement (doi:10.3390/life11111247), 2021-11-17
Supplement: s1 [file s1]

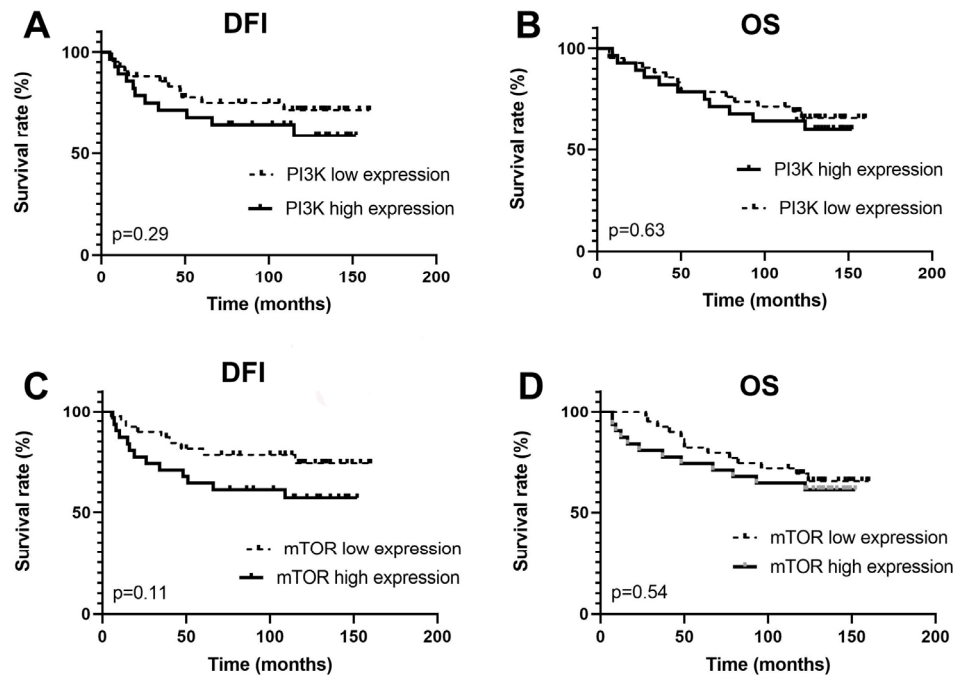

**Figure S1.** Kaplan–Meier survival curves according to PI3K and mTOR protein expression in the TNBC group. DFI, disease free interval; OS, overall survival; **A** PI3K expression did not affect patient DFI **B**. PI3K expression did not affect patient OS **C**. mTOR expression did not affect patient DFI **D**. mTOR expression did not affect patient OS.

**Table S1:** Univariate analysis of tumor parameters as prognostic factors in patients with TNBC

| Parameters                                | Np (%)   | Median DFI time (months) | p value | Median OS time (months) | p value |
|-------------------------------------------|----------|--------------------------|---------|-------------------------|---------|
| <i>Number of patients per group</i>       | 70 (100) |                          |         |                         |         |
| <i>Age at diagnosis</i>                   |          |                          |         |                         |         |
| <50                                       | 19 (27)  | 121                      | 0.53    | 130                     | 0.67    |
| ≥50                                       | 51 (73)  | 109                      |         | 123                     |         |
| <i>Tumor type</i>                         |          |                          |         |                         |         |
| Ductal                                    | 41 (58)  | 98                       | 0.33    | 124                     | 0.54    |
| Lobular                                   | 13 (18)  | 100                      |         | 133                     |         |
| Other*                                    | 16 (24)  | 118                      |         | 120                     |         |
| <i>Lymphovascular/perineural invasion</i> |          |                          |         |                         |         |
| Absent                                    | 54 (77)  | 115                      | 0.001   | 130                     | 0.005   |
| Present                                   | 14 (20)  | 50                       |         | 73                      |         |
| <i>Pathological prognostic stage</i>      |          |                          |         |                         |         |
| I                                         | 10 (14)  | 108                      | 0.52    | 125                     | 0.08    |
| II                                        | 37 (53)  | 109                      |         | 127                     |         |
| III and IV                                | 23 (33)  | 109                      |         | 122                     |         |
| <i>pN stage</i>                           |          |                          |         |                         |         |
| N0                                        | 36 (52)  | 116                      | 0.01    | 130                     | 0.002   |
| N1                                        | 17 (24)  | 78                       |         | 117                     |         |
| N2 and N3                                 | 17 (24)  | 38                       |         | 67                      |         |
| <i>pT stage</i>                           |          |                          |         |                         |         |
| T1                                        | 18 (26)  | 76                       | 0.57    | 119                     | 0.52    |
| T2                                        | 43 (61)  | 110                      |         | 131                     |         |
| T3 and T4                                 | 9 (13)   | 114                      |         | 130                     |         |
| <i>Histologic grade</i>                   |          |                          |         |                         |         |
| I and II                                  | 52 (67)  | 100                      | 0.91    | 130                     | 0.78    |
| III                                       | 26 (33)  | 119                      |         | 124                     |         |
| <i>Metastases</i>                         |          |                          |         |                         |         |
| M0                                        | 55 (79)  | 117                      | <0.0001 | 132                     | <0.0001 |
| M1                                        | 15 (21)  | 20                       |         | 41                      |         |

**Table S2.** Multivariate model DFI

| Variables in the Equation              |       |       |       |    |      |        |                     |         |
|----------------------------------------|-------|-------|-------|----|------|--------|---------------------|---------|
|                                        | B     | SE    | Wald  | df | Sig. | Exp(B) | 95.0% CI for Exp(B) |         |
|                                        |       |       |       |    |      |        | Lower               | Upper   |
| Lymphovascular/<br>perineural invasion | -.177 | 1.136 | .024  | 1  | .876 | .838   | .090                | 7.758   |
| pN                                     | -.022 | .509  | .002  | 1  | .966 | .978   | .361                | 2.651   |
| Metastasis                             | 2.749 | 1.093 | 6.333 | 1  | .012 | 15.634 | 1.837               | 133.074 |
| PTEN_copy_number                       | -.061 | .914  | .004  | 1  | .947 | .941   | .157                | 5.642   |
| PTEN PI3K mTOR                         | 1.179 | 1.589 | .551  | 1  | .458 | 3.253  | .144                | 73.295  |

**Table S3.** Multivariate model OS

| Variables in the Equation              |       |      |        |    |      |        |                     |        |
|----------------------------------------|-------|------|--------|----|------|--------|---------------------|--------|
|                                        | B     | SE   | Wald   | df | Sig. | Exp(B) | 95.0% CI for Exp(B) |        |
|                                        |       |      |        |    |      |        | Lower               | Upper  |
| PTEN_copy_number                       | .076  | .315 | .058   | 1  | .809 | 1.079  | .582                | 2.000  |
| Lymphovascular/<br>perineural invasion | -.440 | .505 | .759   | 1  | .384 | .644   | .239                | 1.733  |
| pN                                     | .203  | .255 | .633   | 1  | .426 | 1.225  | .743                | 2.018  |
| Metastasis                             | 2.927 | .610 | 23.041 | 1  | .000 | 18.679 | 5.653               | 61.728 |

**Table S4:** PTEN, PI3K, mTOR protein expression correlation with the expression of ABCG2, ABCC1 and ABCB1 transporters

|                                     | <b>ABCG2</b> |         | <b>ABCC1</b> |         | <b>ABCB1</b> |         |
|-------------------------------------|--------------|---------|--------------|---------|--------------|---------|
| <b>PTEN</b>                         | P value      | R value | P value      | R value | P value      | R value |
| <i>Whole cohort</i>                 | 0.46         | -0.09   | 0.31         | -0.12   | 0.21         | -0.16   |
| <i>Lymphatic metastasis present</i> | 0.16         | -0.25   | 0.11         | -0.28   | 0.59         | -0.09   |
| <i>Distant metastasis present</i>   | 0.95         | 0.02    | 0.45         | -0.21   | 0.53         | -0.17   |
| <b>PI3K</b>                         |              |         |              |         |              |         |
| <i>Whole cohort</i>                 | 0.61         | 0.06    | 0.32         | 0.12    | 0.91         | -0.01   |
| <i>Lymphatic metastasis present</i> | 0.58         | -0.09   | 0.9          | 0.02    | 0.58         | -0.1    |
| <i>Distant metastasis present</i>   | 0.15         | -0.39   | 0.34         | -0.26   | 0.63         | -0.14   |
| <b>mTOR</b>                         |              |         |              |         |              |         |
| <i>Whole cohort</i>                 | 0.92         | 0.01    | 0.25         | 0.14    | 0.45         | 0.09    |
| <i>Lymphatic metastasis present</i> | 0.21         | 0.22    | 0.16         | 0.25    | 0.76         | 0.06    |
| <i>Distant metastasis present</i>   | 0.39         | 0.23    | 0.87         | -0.05   | 0.72         | 0.09    |
